# Supplementary material for: Incense Use and Cardiovascular Mortality among Chinese in Singapore: The Singapore Chinese Health Study
Source: PubMed Central journal article supplement (PMC4256695; doi:10.1289/ehp.1307662), 2014-08-15
Supplement: ehp.1307662.s001.508.pdf [file ehp.1307662.s001.508.pdf]

**Supplemental Material**

**Incense Use and Cardiovascular Mortality among Chinese in  
Singapore: The Singapore Chinese Health Study**

An Pan, Maggie L. Clark, Li-Wei Ang, Mimi C. Yu, Jian-Min Yuan, and Woon-Puay Koh

**Table S1.** Incense use practices among the current incense users in the Singapore Chinese Health Study (1993-2011).

|                               | <b>Current users</b> | <b>Former users</b> |
|-------------------------------|----------------------|---------------------|
| n                             | 48,620               | 8,259               |
| Duration of incense use       |                      |                     |
| ≤ 10 years                    | 404 (0.8)            | 249 (3.0)           |
| 11-20 years                   | 1073 (2.2)           | 1399 (16.9)         |
| 21-30 years                   | 2508 (5.2)           | 3286 (39.8)         |
| 31-40 years                   | 3828 (7.9)           | 1191 (14.4)         |
| ≥ 40 years                    | 40807 (83.9)         | 2134 (25.8)         |
| Main altar placed in the home |                      |                     |
| Master bedroom                | 88 (0.2)             | NA                  |
| Other bedroom                 | 117 (0.2)            | NA                  |
| Living room                   | 44677 (91.9)         | NA                  |
| Dining room                   | 590 (1.2)            | NA                  |
| Kitchen                       | 3148 (6.5)           | NA                  |
| Intensity of burning          |                      |                     |
| During the day only           | 5340 (11.0)          | NA                  |
| During the night only         | 2270 (4.7)           | NA                  |
| Intermittently during the day | 39291 (80.8)         | NA                  |
| At all times                  | 1719 (3.5)           | NA                  |

Data are shown as n (%). NA: not applicable.

**Table S2.** Alternative models of incense use and cardiovascular mortality in the Singapore Chinese Health Study (1993-2011).

| <b>Exposure</b>    | <b>Persons</b> | <b>Deaths</b> | <b>Person-years</b> | <b>Crude model</b> | <b>Model 1<sup>a</sup></b> | <b>Model 2<sup>b</sup></b> | <b>Model 3<sup>c</sup></b> |
|--------------------|----------------|---------------|---------------------|--------------------|----------------------------|----------------------------|----------------------------|
| Never users        | 6378           | 485           | 95964               | 1.00 (reference)   | 1.00 (reference)           | 1.00 (reference)           | 1.00 (reference)           |
| Former users       | 8259           | 502           | 119400              | 0.85 (0.75, 0.96)  | 0.93 (0.82, 1.05)          | 0.92 (0.81, 1.05)          | 0.91 (0.80, 1.03)          |
| Current users      | 48620          | 4056          | 711397              | 1.14 (1.04, 1.25)  | 1.15 (1.05, 1.27)          | 1.09 (0.99, 1.20)          | 1.06 (0.96, 1.16)          |
| <i>p</i> for trend |                |               |                     | < 0.001            | < 0.001                    | 0.006                      | 0.03                       |
| Non-current users  |                |               |                     | 1.00 (reference)   | 1.00 (reference)           | 1.00 (reference)           | 1.00 (reference)           |
| Current users      | 48620          | 4056          | 711397              | 1.24 (1.16, 1.33)  | 1.20 (1.12, 1.29)          | 1.14 (1.06, 1.22)          | 1.12 (1.04, 1.20)          |

<sup>a</sup>Model 1: the estimates were generated using Cox proportional hazards models, with adjustment for age at recruitment, year of recruitment (1993-1995, 1996-1998), gender, dialect (Hokkien, Cantonese), body mass index (< 20.0, 20.0-23.9, 24.0-27.9, ≥ 28.0 kg/m<sup>2</sup>), alcohol drinking (none, monthly, weekly, daily), moderate activity (< 0.5, 0.5-3.9, ≥ 4.0 hours/week), duration of sleep (hours/day), daily energy intake (kcal/day), dietary intakes of vegetables, fruits, fiber, polyunsaturated fatty acids (grams/day, quartiles), as well as self-reported history of physician-diagnosed hypertension, diabetes, cancer, coronary heart disease and stroke. <sup>b</sup>Model 2: the estimates were generated using Cox proportional hazards models, with adjustment for variables in model 1 plus education (no formal education, primary school, secondary school or higher). <sup>c</sup>Model 3: the estimates were generated using Cox proportional hazards models, with adjustment for variables in model 2 plus years of smoking (never, < 20 years, 20-39 years, ≥ 40 years), dose of smoking (never, ≤ 12, 13-22, 23-32, ≥ 33 cigarettes/day), years since quitting smoking (never, < 1 year, 1-4 years, 5-19 years, ≥ 20 years).

**Table S3.** Duration and frequency of incense use and cardiovascular mortality in the Singapore Chinese Health Study (1993-2011): never users as the reference group.<sup>a</sup>

| Exposure                              | Persons | Person-years | CVD deaths | CVD HR (95% CI)   | CHD deaths | CHD HR (95% CI)   | Stroke deaths | Stroke HR (95% CI) |
|---------------------------------------|---------|--------------|------------|-------------------|------------|-------------------|---------------|--------------------|
| Never use                             | 6378    | 95964        | 485        | 1.00              | 277        | 1.00              | 122           | 1.00               |
| Former use                            | 8259    | 119400       | 502        | 0.91 (0.80, 1.03) | 286        | 0.90 (0.76, 1.06) | 131           | 0.98 (0.77, 1.26)  |
| Current, less than daily use          | 3574    | 52580        | 289        | 0.98 (0.85, 1.14) | 156        | 0.92 (0.75, 1.12) | 80            | 1.11 (0.83, 1.47)  |
| Current, daily use for up to 20 years | 1313    | 20156        | 64         | 1.03 (0.80, 1.34) | 33         | 0.94 (0.66, 1.36) | 18            | 1.13 (0.69, 1.85)  |
| Current, daily use for > 20 years     | 43733   | 638660       | 3703       | 1.06 (0.97, 1.17) | 2099       | 1.05 (0.92, 1.19) | 1030          | 1.19 (0.98, 1.44)  |
| <i>p</i> for trend                    |         |              |            | 0.004             |            | 0.04              |               | 0.02               |

CHD: coronary heart disease; CVD: cardiovascular disease; CI: confidence interval; HR: hazard ratio.

<sup>a</sup>The estimates were generated using Cox proportional hazards models, with adjustment for age at recruitment, year of recruitment (1993-1995, 1996-1998), gender, dialect (Hokkien, Cantonese), education (no formal education, primary school, secondary school or higher), body mass index (BMI; < 20.0, 20.0-23.9, 24.0-27.9,  $\geq$  28.0 kg/m<sup>2</sup>), alcohol drinking (none, monthly, weekly, daily), years of smoking (never, < 20 years, 20-39 years,  $\geq$  40 years), dose of smoking (never,  $\leq$  12, 13-22, 23-32,  $\geq$  33 cigarettes/day), years since quitting smoking (never, < 1 year, 1-4 years, 5-19 years,  $\geq$  20 years), moderate activity (< 0.5, 0.5-3.9,  $\geq$  4.0 hours/week), duration of sleep (hours/day), daily energy intake (kcal/day), dietary intakes of vegetables, fruits, fiber, polyunsaturated fatty acids (grams/day, quartiles), as well as self-reported history of physician-diagnosed hypertension, diabetes, cancer, CHD and stroke.

**Table S4.** Incense use and risk of cardiovascular mortality in the Singapore Chinese Health Study: stratified by history of coronary heart disease or stroke, smoking status, and education level at baseline with never users as the reference group (1993-2011).

| Exposure                                          | Persons | Person-years | CVD deaths | CVD HR (95% CI)   | CHD deaths | CHD HR (95% CI)   | Stroke deaths | Stroke HR (95% CI) |
|---------------------------------------------------|---------|--------------|------------|-------------------|------------|-------------------|---------------|--------------------|
| Stratified by baseline CHD or stroke <sup>a</sup> |         |              |            |                   |            |                   |               |                    |
| Without baseline CHD or stroke                    |         |              |            |                   |            |                   |               |                    |
| Never use                                         | 5977    | 91129        | 377        | 1.00              | 210        | 1.00              | 99            | 1.00               |
| Former use                                        | 7797    | 113787       | 380        | 0.90 (0.78, 1.04) | 211        | 0.89 (0.73, 1.08) | 104           | 0.97 (0.74, 1.28)  |
| Current use                                       | 46082   | 681316       | 3378       | 1.10 (0.98, 1.22) | 1847       | 1.06 (0.92, 1.23) | 972           | 1.22 (0.99, 1.51)  |
| With baseline CHD or stroke                       |         |              |            |                   |            |                   |               |                    |
| Never use                                         | 401     | 4835         | 108        | 1.00              | 67         | 1.00              | 23            | 1.00               |
| Former use                                        | 462     | 5613         | 122        | 0.97 (0.75, 1.26) | 75         | 0.94 (0.68, 1.31) | 27            | 1.03 (0.59, 1.80)  |
| Current use                                       | 2538    | 30081        | 678        | 0.99 (0.80, 1.22) | 441        | 1.01 (0.77, 1.32) | 156           | 1.08 (0.68, 1.69)  |
| Stratified by smoking status <sup>b</sup>         |         |              |            |                   |            |                   |               |                    |
| Never smokers                                     |         |              |            |                   |            |                   |               |                    |
| Never use                                         | 4845    | 74956        | 300        | 1.00              | 160        | 1.00              | 80            | 1.00               |
| Former use                                        | 6109    | 90555        | 282        | 0.90 (0.76, 1.06) | 154        | 0.91 (0.73, 1.14) | 80            | 1.00 (0.73, 1.36)  |
| Current use                                       | 32976   | 499294       | 2144       | 1.06 (0.94, 1.20) | 1137       | 1.05 (0.88, 1.24) | 672           | 1.26 (0.99, 1.59)  |
| Former smokers                                    |         |              |            |                   |            |                   |               |                    |
| Never use                                         | 613     | 8309         | 70         | 1.00              | 44         | 1.00              | 14            | 1.00               |
| Former use                                        | 1034    | 13816        | 99         | 0.98 (0.72, 1.34) | 56         | 0.87 (0.59, 1.30) | 23            | 1.15 (0.59, 2.24)  |
| Current use                                       | 5346    | 71726        | 651        | 1.17 (0.91, 1.50) | 407        | 1.15 (0.83, 1.58) | 154           | 1.26 (0.72, 2.20)  |
| Current smokers                                   |         |              |            |                   |            |                   |               |                    |
| Never use                                         | 920     | 12699        | 115        | 1.00              | 73         | 1.00              | 28            | 1.00               |
| Former use                                        | 1116    | 15029        | 121        | 0.89 (0.69, 1.15) | 76         | 0.90 (0.65, 1.24) | 28            | 0.83 (0.49, 1.41)  |
| Current use                                       | 10298   | 140377       | 1261       | 0.99 (0.81, 1.20) | 744        | 0.94 (0.74, 1.20) | 302           | 0.94 (0.63, 1.39)  |
| Stratified by education level <sup>c</sup>        |         |              |            |                   |            |                   |               |                    |
| No formal education                               |         |              |            |                   |            |                   |               |                    |
| Never use                                         | 1110    | 15835        | 137        | 1.00              | 79         | 1.00              | 32            | 1.00               |
| Former use                                        | 1223    | 17228        | 135        | 0.89 (0.70, 1.13) | 72         | 0.81 (0.58, 1.11) | 42            | 1.24 (0.78, 1.97)  |
| Current use                                       | 15000   | 215540       | 1650       | 0.92 (0.77, 1.10) | 884        | 0.84 (0.66, 1.06) | 519           | 1.27 (0.89, 1.82)  |

| Exposure                        | Persons | Person-years | CVD deaths | CVD HR (95% CI)   | CHD deaths | CHD HR (95% CI)   | Stroke deaths | Stroke HR (95% CI) |
|---------------------------------|---------|--------------|------------|-------------------|------------|-------------------|---------------|--------------------|
| Primary school level            |         |              |            |                   |            |                   |               |                    |
| Never use                       | 2107    | 31338        | 175        | 1.00              | 101        | 1.00              | 46            | 1.00               |
| Former use                      | 2958    | 42286        | 208        | 0.91 (0.74, 1.11) | 122        | 0.91 (0.70, 1.19) | 48            | 0.84 (0.56, 1.25)  |
| Current use                     | 22985   | 336371       | 1844       | 1.08 (0.92, 1.26) | 1068       | 1.04 (0.85, 1.28) | 484           | 1.18 (0.87, 1.60)  |
| Secondary school level or above |         |              |            |                   |            |                   |               |                    |
| Never use                       | 3161    | 48791        | 173        | 1.00              | 97         | 1.00              | 44            | 1.00               |
| Former use                      | 4078    | 59886        | 159        | 0.93 (0.75, 1.16) | 92         | 0.94 (0.70, 1.25) | 41            | 1.04 (0.67, 1.59)  |
| Current use                     | 10635   | 159485       | 562        | 1.21 (1.01, 1.44) | 336        | 1.24 (0.98, 1.56) | 125           | 1.19 (0.83, 1.69)  |

CHD: coronary heart disease; CVD: cardiovascular disease; CI: confidence interval; HR: hazard ratio.

<sup>a</sup>The estimates were generated using Cox proportional hazards models, with adjustment for age at recruitment, year of recruitment, gender, dialect, education, body mass index, alcohol drinking, years of smoking, dose of smoking, years since quitting smoking, moderate activity, duration of sleep, daily energy intake, dietary intakes of vegetables, fruits, fiber, polyunsaturated fatty acids, self-reported history of physician-diagnosed hypertension, diabetes, and cancer. <sup>b</sup>The estimates were generated using Cox proportional hazards models, with adjustment for age at recruitment, year of recruitment, gender, dialect, education, body mass index, alcohol drinking, moderate activity, duration of sleep, daily energy intake, dietary intakes of vegetables, fruits, fiber, polyunsaturated fatty acids, self-reported history of physician-diagnosed hypertension, diabetes, cancer, CHD and stroke. <sup>c</sup>The estimates were generated using Cox proportional hazards models, with adjustment for age at recruitment, year of recruitment, gender, dialect, body mass index, alcohol drinking, years of smoking, dose of smoking, years since quitting smoking, moderate activity, duration of sleep, daily energy intake, dietary intakes of vegetables, fruits, fiber, polyunsaturated fatty acids, self-reported history of physician-diagnosed hypertension, diabetes, cancer, CHD and stroke.

**Table S5.** Incense use and cardiovascular mortality in the Singapore Chinese Health Study: further adjustment for secondhand smoking (1999-2011).<sup>a</sup>

| Exposure                                            | Persons | Person-years | CVD deaths | CVD HR (95% CI)   | CHD deaths | CHD HR (95% CI)   | Stroke deaths | Stroke HR (95% CI) |
|-----------------------------------------------------|---------|--------------|------------|-------------------|------------|-------------------|---------------|--------------------|
| Total participants                                  |         |              |            |                   |            |                   |               |                    |
| Never incense users                                 | 5243    | 84263        | 245        | 1.00              | 141        | 1.00              | 60            | 1.00               |
| Former incense users                                | 7016    | 106414       | 283        | 0.99 (0.83, 1.17) | 159        | 0.96 (0.76, 1.20) | 70            | 1.03 (0.73, 1.46)  |
| Current incense users                               | 40063   | 625520       | 2241       | 1.19 (1.04, 1.36) | 1284       | 1.19 (1.00, 1.42) | 583           | 1.29 (0.98, 1.69)  |
| Participants with exposure to secondhand smoking    |         |              |            |                   |            |                   |               |                    |
| Never incense users                                 | 903     | 14589        | 35         | 1.00              | 21         | 1.00              | 9             | 1.00               |
| Former incense users                                | 1206    | 18396        | 35         | 0.83 (0.52, 1.32) | 22         | 0.86 (0.47, 1.56) | 9             | 1.88 (0.35, 2.23)  |
| Current incense users                               | 11086   | 173574       | 569        | 1.25 (0.89, 1.77) | 319        | 1.17 (0.75, 1.83) | 160           | 1.42 (0.72, 2.81)  |
| Participants without exposure to secondhand smoking |         |              |            |                   |            |                   |               |                    |
| Never incense users                                 | 4340    | 69673        | 210        | 1.00              | 120        | 1.00              | 51            | 1.00               |
| Former incense users                                | 5810    | 88018        | 248        | 1.01 (0.84, 1.21) | 137        | 0.97 (0.76, 1.24) | 61            | 1.06 (0.73, 1.54)  |
| Current incense users                               | 28977   | 451947       | 1672       | 1.17 (1.01, 1.36) | 965        | 1.19 (0.98, 1.45) | 423           | 1.25 (0.93, 1.68)  |

CHD: coronary heart disease; CI: confidence interval; HR: hazard ratio.

<sup>a</sup>The analyses were conducted among 52,322 participants who participated in follow-up I interview (1999-2004) and provided information on secondhand smoking at home or at work on a daily basis. The estimates were generated using Cox proportional hazards models, with adjustment for age at recruitment, year of recruitment (1993-1995, 1996-1998), gender, dialect (Hokkien, Cantonese), education (no formal education, primary school, secondary school or higher), body mass index (BMI; < 20.0, 20.0-23.9, 24.0-27.9,  $\geq$  28.0 kg/m<sup>2</sup>), alcohol drinking (none, monthly, weekly, daily), years of smoking (never, < 20 years, 20-39 years,  $\geq$  40 years), dose of smoking (never,  $\leq$  12, 13-22, 23-32,  $\geq$  33 cigarettes/day), years since quitting smoking (never, < 1 year, 1-4 years, 5-19 years,  $\geq$  20 years), moderate activity (< 0.5, 0.5-3.9,  $\geq$  4.0 hours/week), duration of sleep (hours/day), daily energy intake (kcal/day), dietary intakes of vegetables, fruits, fiber, polyunsaturated fatty acids (grams/day, quartiles), self-reported history of physician-diagnosed hypertension, diabetes, CHD and stroke, as well as exposure to secondhand smoking (yes or no; except in the stratified analysis).
